# Supplementary material
Source: MDPI journal article supplement (https://www.mdpi.com/2076-3417/10/7/2505)
Supplement: s1 [file s1]

# Silver nanoparticles eco-friendly synthesized by *Achyranthes aspera* and *Scoparia dulcis* leaf broth as an effective fungicide

Ngoc Thuy Trang Le<sup>1</sup>, Dai Hai Nguyen<sup>2,3</sup>, Ngoc Hoi Nguyen<sup>2</sup>, Yern Chee Ching<sup>4</sup>, Dong Yen Pham Nguyen<sup>2</sup>, Cuong Quoc Ngo<sup>5</sup>, Hang Nguyen Thi Nhat<sup>6</sup>, Thai Thanh Hoang Thi<sup>5,\*</sup>

<sup>1</sup> Institute of Research and Development, Duy Tan University, Danang 550000, Vietnam; lenthuytrang4@duytan.edu.vn

<sup>2</sup> Institute of Applied Materials Science, Vietnam Academy of Science and Technology, 01 TL29 District 12, Ho Chi Minh City, 70000, Vietnam; nguyendaihai0511@gmail.com

<sup>3</sup> Graduate University of Science and Technology, Vietnam Academy of Science and Technology, Hanoi, Vietnam.

<sup>4</sup> Department of Chemical Engineering, Faculty of Engineering, University of Malaya, 50603 Kuala Lumpur, Malaysia; chingyc@um.edu.my

<sup>5</sup> Biomaterials and Nanotechnology Research Group, Faculty of Applied Sciences, Ton Duc Thang University, Ho Chi Minh City, Vietnam.

<sup>6</sup> Faculty of Natural Sciences, Thu Dau Mot University, Thu Dau Mot City 820000, Binh Duong Province, Vietnam; hangntn@tdmu.edu.vn

\* Corresponding author: hoangthithaitanh@tdtu.edu.vn; Tel: +84(0)2837755058

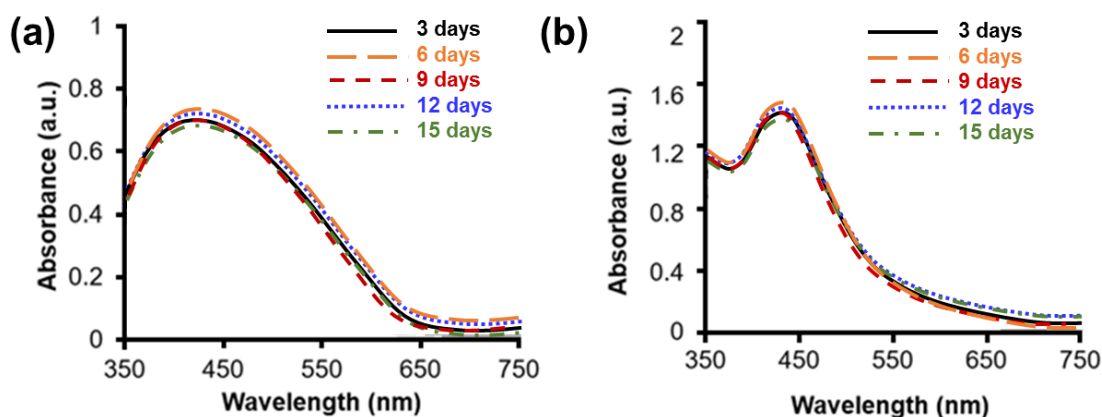

**Figure S1:** The UV-vis spectra of AA.AgNPs (a) and SD.AgNPs (b) stored at 4°C in brown bottle after various time intervals.
